# Supplementary material for: Quantitative proteomic analysis of gastric cancer tissue reveals novel proteins in platelet-derived growth factor B signaling pathway
Source: PubMed Central journal article supplement (PMC5400646; doi:10.18632/oncotarget.15908), 2017-03-06
Supplement: oncotarget-08-22059-s001.pdf [file oncotarget-08-22059-s001.pdf]

# Quantitative proteomic analysis of gastric cancer tissue reveals novel proteins in platelet-derived growth factor B signaling pathway

## SUPPLEMENTARY MATERIALS

### SUPPLEMENTARY FIGURES AND TABLE

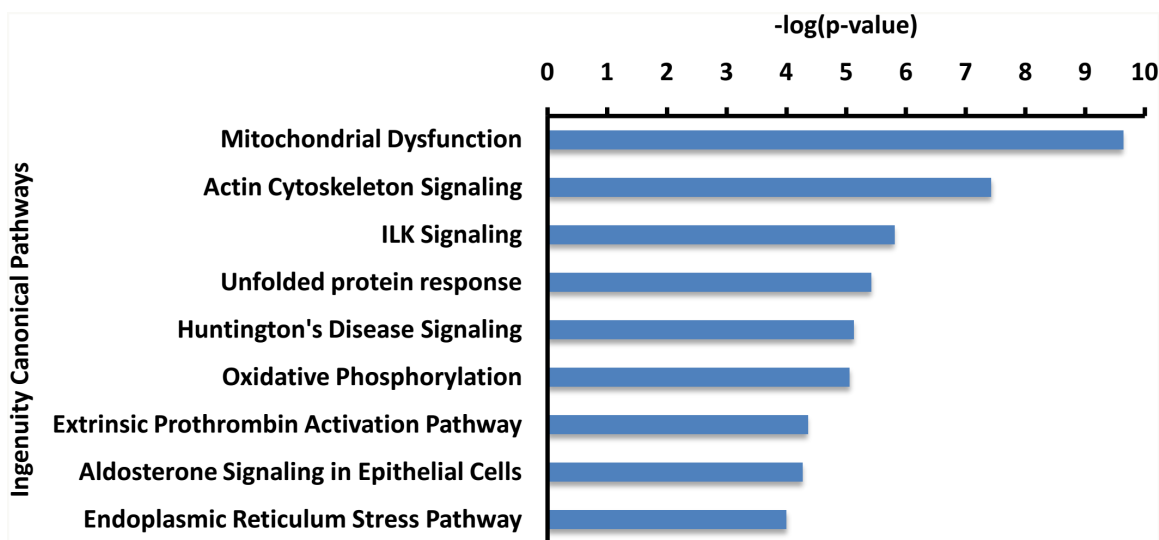

Supplementary Figure 1: The top 10 pathways relevant to the differential expression proteins were shown with the corresponding score (A).

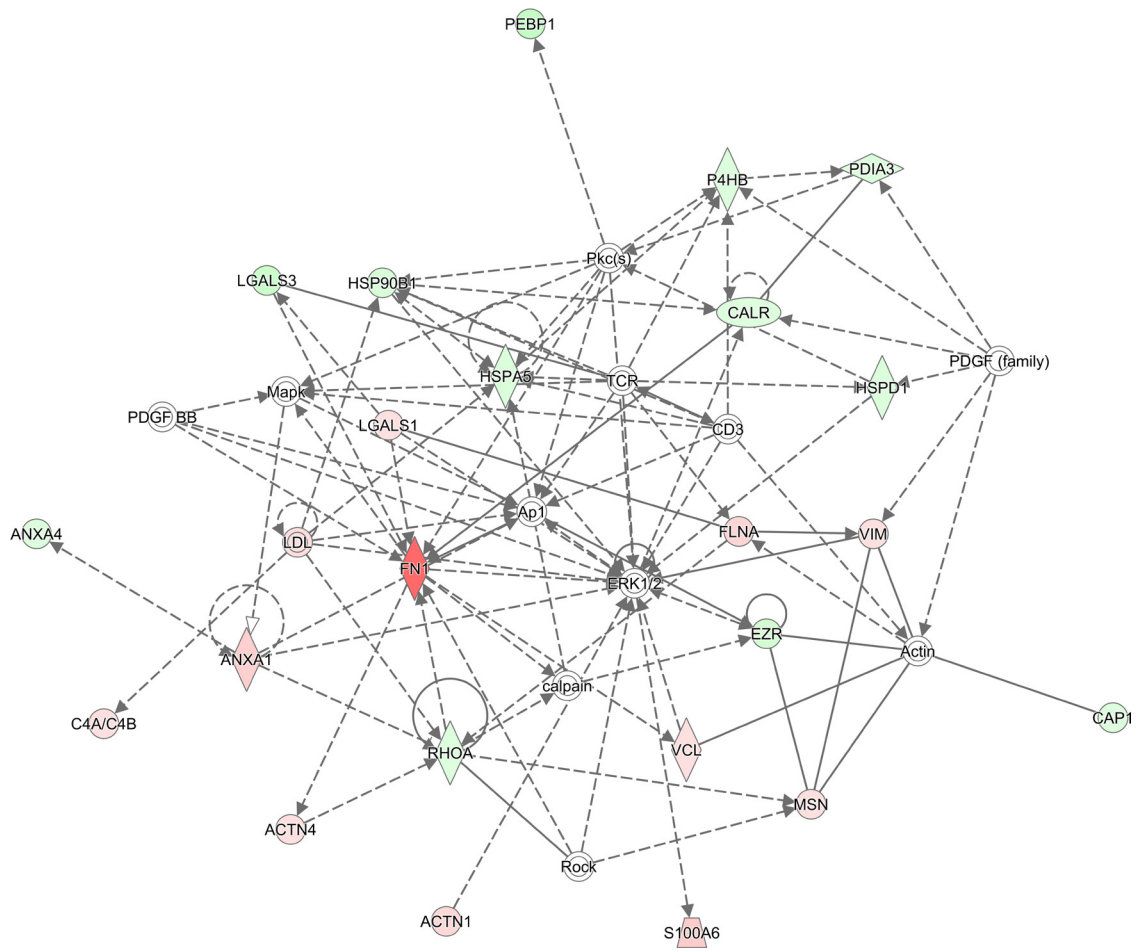

Supplementary Figure 2: PDGF family and PDGF-BB are the two major missing nodes in the network analysis (B).

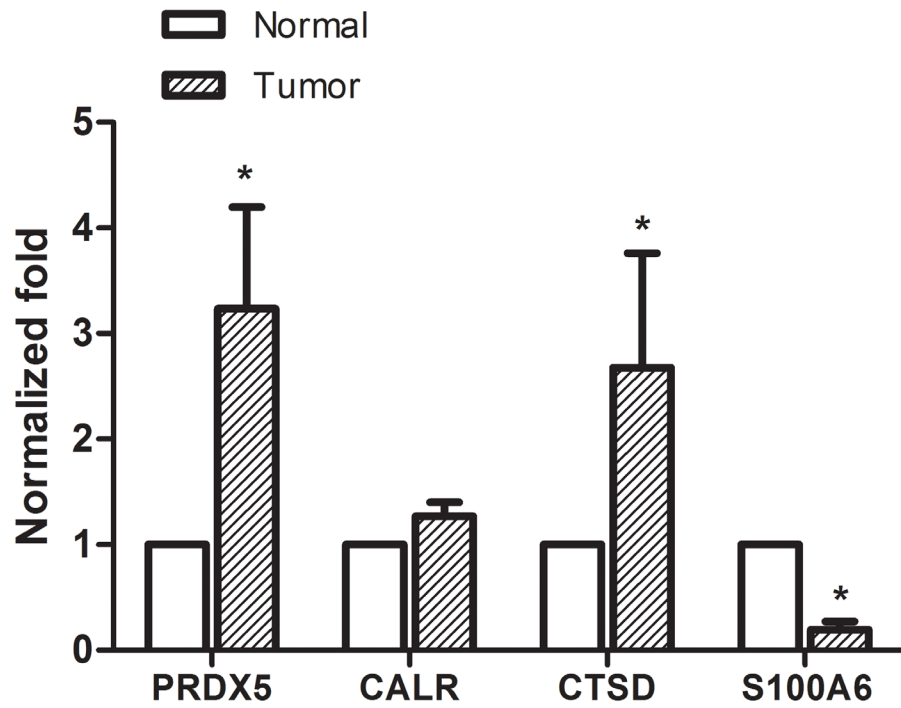

Supplementary Figure 3: Densitometric quantification of blots presented in Figure 3.

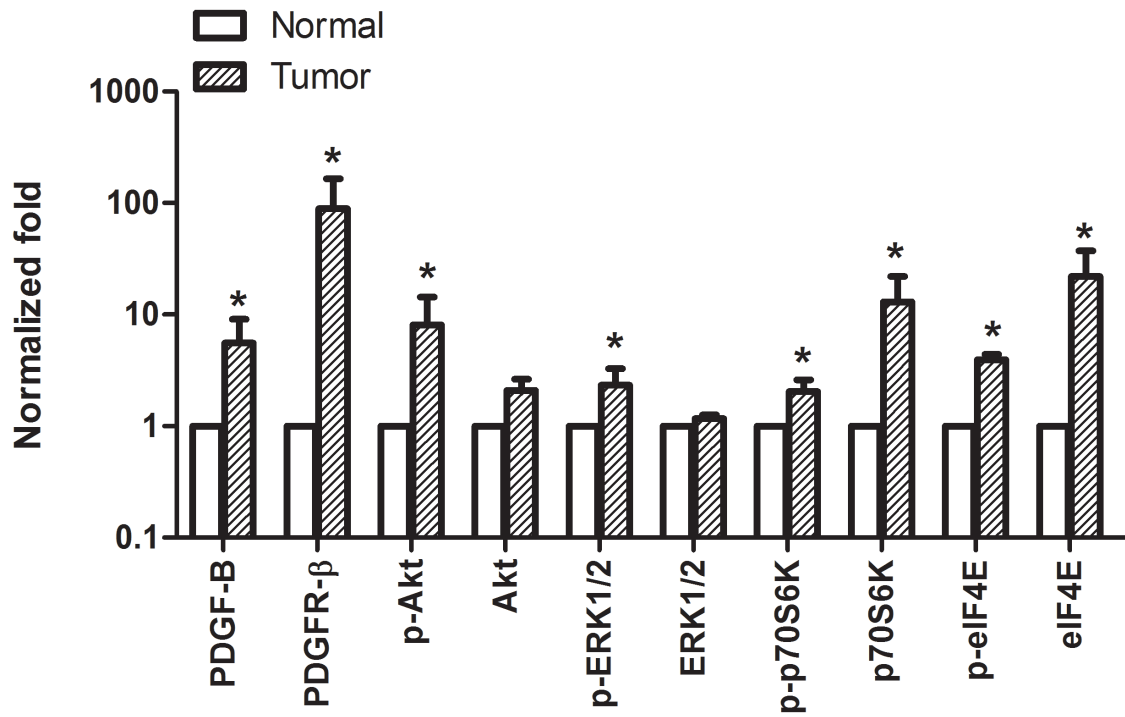

Supplementary Figure 4: Densitometric quantification of blots presented in Figure 4.

**Supplementary Table 1: The clinical and pathological data of gastric cancer patients (6 samples)**

| Sample no. | Gender | Age (years) | Tumor position | pathology      | Grade | Stage | TNM    | Type      |
|------------|--------|-------------|----------------|----------------|-------|-------|--------|-----------|
| 1          | Male   | 61          | Gastric body   | Adenocarcinoma | 3     | IIa   | T2N1M0 | Malignant |
| 2          | Male   | 45          | Gastric body   | Adenocarcinoma | 3     | IIb   | T3N1M0 | Malignant |
| 3          | Male   | 64          | Gastric body   | Adenocarcinoma | 3     | Ib    | T2N0M0 | Malignant |
| 4          | Male   | 54          | Gastric body   | Adenocarcinoma | 3     | IIIa  | T3N2M0 | Malignant |
| 5          | Female | 57          | Gastric body   | Adenocarcinoma | 3     | IIb   | T3N1M0 | Malignant |
| 6          | Male   | 73          | Gastric body   | Adenocarcinoma | 3     | IIb   | T2N2M0 | Malignant |
